# Supplementary material for: Doping P atom with a lone pair: an effective strategy to realize high HER catalytic activity and avoid deactivation under wide H* coverage on 2D silicene and germanene by increasing the structural rigidity
Source: Royal Society of Chemistry journal article supplement (doi:10.1039/d2nr02455a), 2022-01-01
Supplement: d2nr02455a1.pdf [file d2nr02455a1.pdf]

# Electronic Supplementary Information

## **Doping P Atom with Lone Pair: an Effective Strategy to Realize Considerably High HER Catalytic Activity under a Wide H\* Coverage on 2D Silicene and Germanene by Increasing the Structural Rigidity**

Wenyang Liao<sup>a</sup>, Guangtao Yu<sup>\*a</sup>, Lusi Zhao<sup>a</sup>, Hu Zhu<sup>a</sup> and Wei Chen<sup>\*a,b</sup>

<sup>a</sup>Engineering Research Center of Industrial Biocatalysis, Fujian Province University, Fujian Provincial Key Laboratory of Advanced Materials Oriented Chemical Engineering, Fujian-Taiwan Science and Technology Cooperation Base of Biomedical Materials and Tissue Engineering, College of Chemistry and Materials Science, Fujian Normal University, Fuzhou, 350007, China

<sup>b</sup>Fujian Provincial Key Laboratory of Theoretical and Computational Chemistry, Xiamen University, Xiamen, 361005, China

Email address: [yugt@fjnu.edu.cn](mailto:yugt@fjnu.edu.cn) (G.T. Yu) and [chenwei@fjnu.edu.cn](mailto:chenwei@fjnu.edu.cn) (W. Chen)

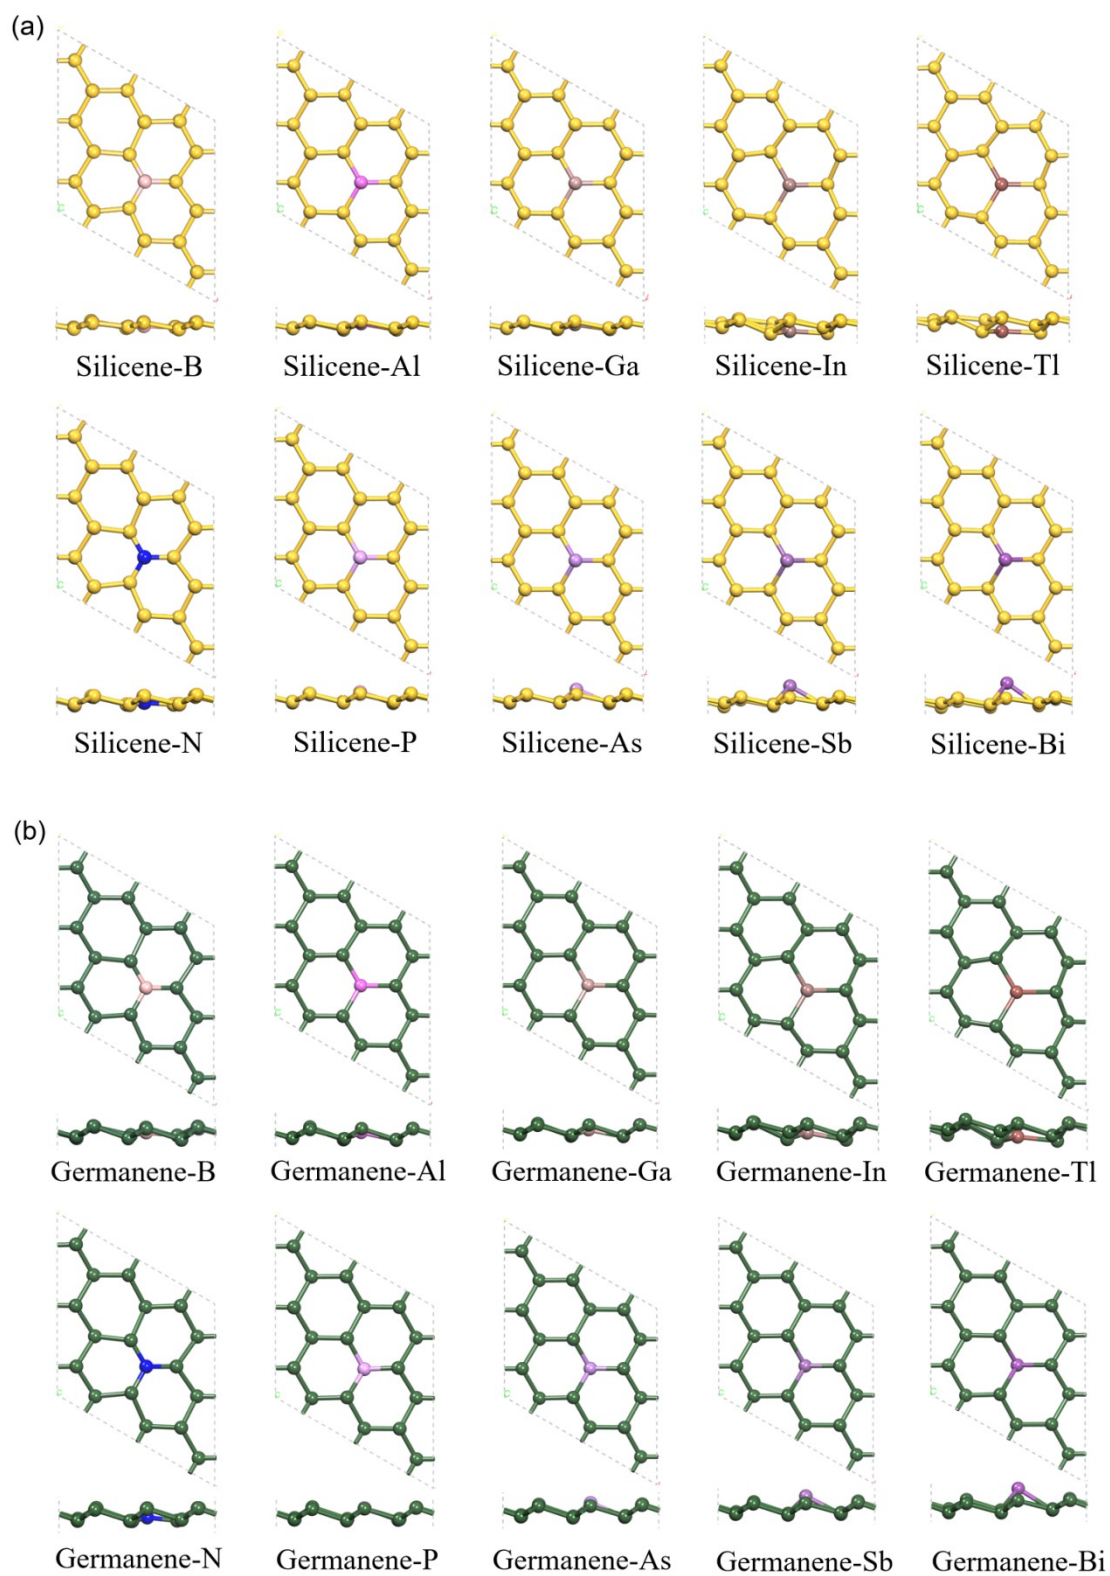

**Fig. S1** The top and side views of the optimized structures of Silicene-X (a) and Germanene-X (b) systems (X=B, Al, Ga, In, Tl and N, P, As, Sb, Bi).

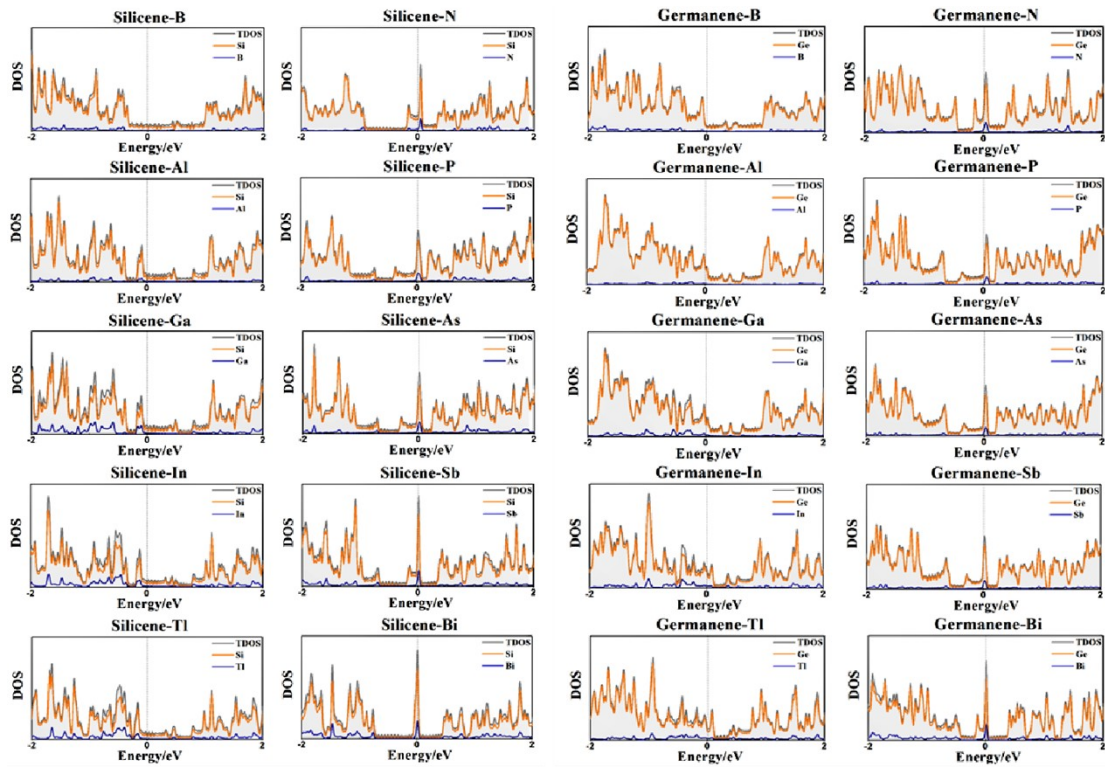

**Fig. S2** The calculated DOSs for the Silicene-X and Germanene-X systems.

**Table S1** The computed  $\Delta G_{H^*}$  values in vacuum and in solvation for silicene, germanene, Silicene-P and Germanene-P systems, respectively.

| Systems     | Adsorption sites | $\Delta G_{H^*}$ (eV) |              |
|-------------|------------------|-----------------------|--------------|
|             |                  | in vacuum             | in solvation |
| Silicene    | T <sub>Si</sub>  | 0.413                 | 0.408        |
| Germanene   | T <sub>Ge</sub>  | 0.709                 | 0.703        |
| Silicene-P  | T <sub>P</sub>   | 0.297                 | 0.269        |
|             | T <sub>1</sub>   | -0.021                | -0.030       |
|             | T <sub>2</sub>   | 0.028                 | 0.026        |
|             | T <sub>3</sub>   | -0.120                | -0.128       |
|             | T <sub>4</sub>   | 0.098                 | 0.090        |
| Germanene-P | T <sub>P</sub>   | 0.099                 | 0.094        |
|             | T <sub>1</sub>   | 0.093                 | 0.110        |
|             | T <sub>2</sub>   | 0.141                 | 0.155        |
|             | T <sub>3</sub>   | 0.225                 | 0.228        |
|             | T <sub>4</sub>   | 0.451                 | 0.440        |

**Table S2** The calculated  $\Delta G_{H^*}$  values at the  $T_X$  and  $T_1\sim T_4$  sites for Silicene-X and Germanene-X systems (X=B, Al, Ga, In, Tl and N, P, As, Sb, Bi).

| Systems      | Lattice constants<br>(Å) | $\Delta G_{H^*}$ (eV) |        |        |        |       |
|--------------|--------------------------|-----------------------|--------|--------|--------|-------|
|              |                          | $T_X$                 | $T_1$  | $T_2$  | $T_3$  | $T_4$ |
| Silicene-B   | 11.440                   | -0.012                | 0.191  | 0.153  | 0.203  | 0.227 |
| Silicene-Al  | 11.650                   | 0.359                 | -0.017 | 0.238  | -0.012 | 0.266 |
| Silicene-Ga  | 11.650                   | 0.617                 | -0.011 | 0.220  | 0.001  | 0.241 |
| Silicene-In  | 11.650                   | 0.775                 | -0.066 | 0.203  | -0.008 | 0.214 |
| Silicene-Tl  | 11.650                   | 1.553                 | -0.076 | 0.157  | 0.002  | 0.191 |
| Silicene-N   | 11.240                   | 0.173                 | -0.250 | -0.004 | -0.199 | 0.055 |
| Silicene-P   | 11.460                   | 0.297                 | -0.021 | 0.028  | -0.120 | 0.098 |
| Silicene-As  | 11.490                   | 0.582                 | -0.332 | 0.071  | -0.097 | 0.157 |
| Silicene-Sb  | 11.550                   | 0.742                 | -0.320 | 0.128  | -0.072 | 0.286 |
| Silicene-Bi  | 11.550                   | 1.126                 | -0.344 | 0.156  | -0.094 | 0.387 |
| Germanene-B  | 11.870                   | -0.094                | 0.402  | 0.407  | 0.461  | 0.552 |
| Germanene-Al | 12.070                   | 0.431                 | 0.172  | 0.524  | 0.338  | 0.563 |
| Germanene-Ga | 12.070                   | 0.672                 | 0.308  | 0.528  | 0.372  | 0.554 |
| Germanene-In | 12.075                   | 1.094                 | 0.279  | 0.484  | 0.377  | 0.527 |
| Germanene-Tl | 12.100                   | 1.644                 | 0.353  | 0.510  | 0.424  | 0.520 |
| Germanene-N  | 11.787                   | 0.030                 | -0.046 | 0.213  | 0.209  | 0.459 |
| Germanene-P  | 11.940                   | 0.099                 | 0.082  | 0.141  | 0.225  | 0.451 |
| Germanene-As | 11.966                   | 0.404                 | 0.106  | 0.388  | 0.246  | 0.467 |
| Germanene-Sb | 12.046                   | 0.554                 | 0.098  | 0.401  | 0.233  | 0.489 |
| Germanene-Bi | 12.060                   | 0.924                 | 0.069  | 0.417  | 0.230  | 0.583 |

**Table S3** The angles of H-Si-Si/H-Si-X or H-Ge-Ge/H-Ge-X with the maximum deviation at the adsorption sites corresponding to relatively small absolute  $\Delta G_{H^*}$  values for the doped Silicene-X and Germanene-X systems.

| Systems      | Adsorption sites | $\Delta G_{H^*}$ (eV) | $\angle$ H-Si-Si/H-Si-X |
|--------------|------------------|-----------------------|-------------------------|
| Silicene-B   | T <sub>3</sub>   | 0.203                 | 98.2                    |
| Silicene-Al  | T <sub>3</sub>   | -0.012                | 98.4                    |
| Silicene-B   | T <sub>1</sub>   | 0.191                 | 98.9                    |
| Silicene-P   | T <sub>3</sub>   | -0.120                | 100.9                   |
| Silicene-P   | T <sub>1</sub>   | -0.021                | 101.4                   |
| Silicene-Al  | T <sub>1</sub>   | -0.017                | 101.5                   |
| Silicene-Al  | T <sub>2</sub>   | 0.238                 | 102.8                   |
| Silicene-In  | T <sub>2</sub>   | 0.203                 | 103.3                   |
| Silicene-N   | T <sub>4</sub>   | 0.055                 | 103.5                   |
| Silicene-N   | T <sub>2</sub>   | -0.004                | 104.4                   |
| Silicene-Ga  | T <sub>3</sub>   | 0.001                 | 105.1                   |
| Silicene-In  | T <sub>1</sub>   | -0.066                | 105.6                   |
| Silicene-Tl  | T <sub>3</sub>   | 0.002                 | 106.3                   |
| Silicene-As  | T <sub>4</sub>   | 0.157                 | 114.2                   |
| Silicene-P   | T <sub>2</sub>   | 0.028                 | 116.0                   |
| Silicene-As  | T <sub>2</sub>   | 0.071                 | 119.1                   |
| Silicene-Sb  | T <sub>2</sub>   | 0.128                 | 121.5                   |
| Silicene-Bi  | T <sub>2</sub>   | 0.156                 | 122.4                   |
| Systems      | Adsorption sites | $\Delta G_{H^*}$ (eV) | $\angle$ H-Ge-Ge/H-Ge-X |
| Germanene-N  | T <sub>1</sub>   | -0.046                | 98.4                    |
| Germanene-N  | T <sub>2</sub>   | 0.213                 | 98.5                    |
| Germanene-P  | T <sub>2</sub>   | 0.141                 | 99.6                    |
| Germanene-Al | T <sub>1</sub>   | 0.172                 | 99.9                    |
| Germanene-In | T <sub>1</sub>   | 0.279                 | 103.8                   |
| Germanene-Bi | T <sub>3</sub>   | 0.230                 | 106.3                   |

|              |                |       |       |
|--------------|----------------|-------|-------|
| Germanene-Sb | T <sub>3</sub> | 0.233 | 110.6 |
| Germanene-P  | T <sub>3</sub> | 0.225 | 114.1 |
| Germanene-Sb | T <sub>1</sub> | 0.098 | 114.2 |
| Germanene-As | T <sub>3</sub> | 0.246 | 114.6 |
| Germanene-As | T <sub>1</sub> | 0.106 | 115.1 |
| Germanene-Bi | T <sub>1</sub> | 0.069 | 115.2 |
| Germanene-P  | T <sub>1</sub> | 0.082 | 115.3 |
| Germanene-N  | T <sub>3</sub> | 0.209 | 120.2 |

---
